# Supplementary material for: Estimating global trends in total and childhood antibiotic consumption, 2011-2015
Source: PubMed Central journal article supplement — BMJ Glob Health. 2019 Feb 27;4(1):e001241. doi: 10.1136/bmjgh-2018-001241 (PMC6407570; doi:10.1136/bmjgh-2018-001241), 2019-02-27

**Estimating global trends in total and childhood antibiotic consumption, 2011-2015: Appendix**

Charlotte Jackson<sup>1</sup>, Yingfen Hsia<sup>1</sup>, Julia A Bielicki<sup>1,2</sup>, Sally Ellis<sup>3</sup>, Peter Stephens<sup>4</sup>, Ian CK Wong<sup>5,6</sup>, Mike Sharland<sup>1</sup>

<sup>1</sup> Paediatric Infectious Diseases Research Group, Institute of Infection and Immunity, St George's, University of London, Cranmer Terrace, London SW17 0RE, United Kingdom

<sup>2</sup> Paediatric Pharmacology and Paediatric Infectious Diseases, University Children's Hospital Basel, Spitalstrasse 33, 4056 Basel, Switzerland

<sup>3</sup> Global Antibiotic Research and Development Partnership, 15 Chemin Louis-Dunant, 1202 Geneva, Switzerland

<sup>4</sup> IQVIA, 210 Pentonville Road, London N1 9JY, United Kingdom

<sup>5</sup> UCL School of Pharmacy, 29-39 Brunswick Square, London WC1N 1AX

<sup>6</sup> Department of Pharmacology & Pharmacy, University of Hong Kong

Appendix Table 1: Sectors covered by the IQVIA data in each participating country.

| <b>Country</b>                       | <b>Retail</b> | <b>Hospital</b> |
|--------------------------------------|---------------|-----------------|
| <i>Low / middle income countries</i> |               |                 |
| Algeria                              | X             |                 |
| Argentina                            | X             |                 |
| Bangladesh                           | X             |                 |
| Bosnia                               | X             | X               |
| Brazil                               | X             |                 |
| Bulgaria                             | X             | X               |
| Central America*                     | X             |                 |
| China                                | X             | X               |
| Colombia                             | X             |                 |
| Croatia                              | X             | X               |
| Dominican Republic                   | X             |                 |
| Ecuador                              | X             |                 |
| Egypt                                | X             |                 |
| Francophone West Africa†             | X             |                 |
| India                                | X             | X               |
| Indonesia                            | X             | X               |
| Jordan                               | X             |                 |
| Kazakhstan                           | X             | X               |
| Lebanon                              | X             |                 |
| Malaysia                             | X             | X               |
| Mexico                               | X             |                 |
| Morocco                              | X             | X               |
| Pakistan                             | X             |                 |
| Peru                                 | X             |                 |
| Philippines                          | X             | X               |
| Romania                              | X             | X               |
| Russia                               | X             | X               |
| Serbia                               | X             | X               |
| South Africa                         | X             | X               |
| Sri Lanka                            | X             |                 |
| Thailand                             | X             | X               |
| Tunisia                              | X             | X               |
| Turkey                               | X             | X               |
| Ukraine                              | X             | X               |
| Venezuela                            | X             |                 |
| Vietnam                              | X             | X               |
| <i>High income countries</i>         |               |                 |
| Australia                            | X             | X               |
| Austria                              | X             | X               |
| Belgium                              | X             | X               |

| <b>Country</b>           | <b>Retail</b> | <b>Hospital</b> |
|--------------------------|---------------|-----------------|
| Canada                   | X             | X               |
| Chile                    | X             |                 |
| Czech Republic           | X             | X               |
| Estonia                  | X             |                 |
| Finland                  | X             | X               |
| France                   | X             | X               |
| Germany                  | X             | X               |
| Greece                   | X             |                 |
| Hong Kong                | X             | X               |
| Hungary                  | X             | X               |
| Ireland                  | X             | X               |
| Italy                    | X             | X               |
| Japan                    | X             | X               |
| Korea                    | X             | X               |
| Kuwait                   | X             |                 |
| Latvia                   | X             |                 |
| Lithuania                | X             | X               |
| Luxembourg               | X             |                 |
| Netherlands              | X             |                 |
| New Zealand              | X             | X               |
| Norway                   | X             | X               |
| Poland                   | X             | X               |
| Portugal                 | X             | X               |
| Puerto Rico              | X             | X               |
| Saudi Arabia             | X             |                 |
| Singapore                | X             | X               |
| Slovakia                 | X             | X               |
| Slovenia                 | X             | X               |
| Spain                    | X             | X               |
| Sweden                   | X             | X               |
| Switzerland              | X             | X               |
| Taiwan                   | X             | X               |
| United Arab Emirates     | X             |                 |
| United Kingdom           | X             | X               |
| United States of America | X             | X               |
| Uruguay                  | X             | X               |

\* Aggregated data for Costa Rica, El Salvador, Guatemala, Honduras, Nicaragua, Panama

† Aggregated data for Benin, Burkina Faso, Cameroon, Côte d'Ivoire, Democratic Republic of the Congo, Gabon, Guinea, Mali, Senegal, Togo

*List of child-appropriate formulations*

Oral Solid Ordinary Orally Disintegrating Tablets  
Oral Solid Ordinary Buccal Tablets  
Oral Solid Ordinary Chewable Tablets  
Oral Solid Ordinary Effervescent Tablets  
Oral Solid Ordinary Soluble Tablets  
Oral Solid Ordinary Powders  
Oral Solid Ordinary Granules  
Oral Solid Ordinary Unit Dose Powders  
Oral Solid Retard Unit Dose Powders  
Oral Solid Retard Other Powders/Granules  
Oral Liquid Unit Dose Pressurised Aerosols  
Oral Liquid Ordinary Soluble Powders  
Oral Liquid Ordinary Unit Dose Powders  
Oral Liquid Ordinary Other Powders/Granules  
Oral Liquid Ordinary Liquids  
Oral Liquid Ordinary Drops  
Oral Liquid Ordinary Dry Suspensions/Syrups/Drops  
Oral Liquid Ordinary Suspensions  
Oral Liquid Ordinary Syrups  
Oral Liquid Ordinary Unit Dose Liquids  
Oral Liquid Retard Soluble Powders  
Oral Liquid Retard Unit Dose Powders

Appendix Figure 1: Compound annual growth rates in consumption per person (all formulations) or per child aged 0-4 years (child-appropriate formulations) of Access and Watch antibiotics for individual countries, 2011-2015. Source: IQVIA.

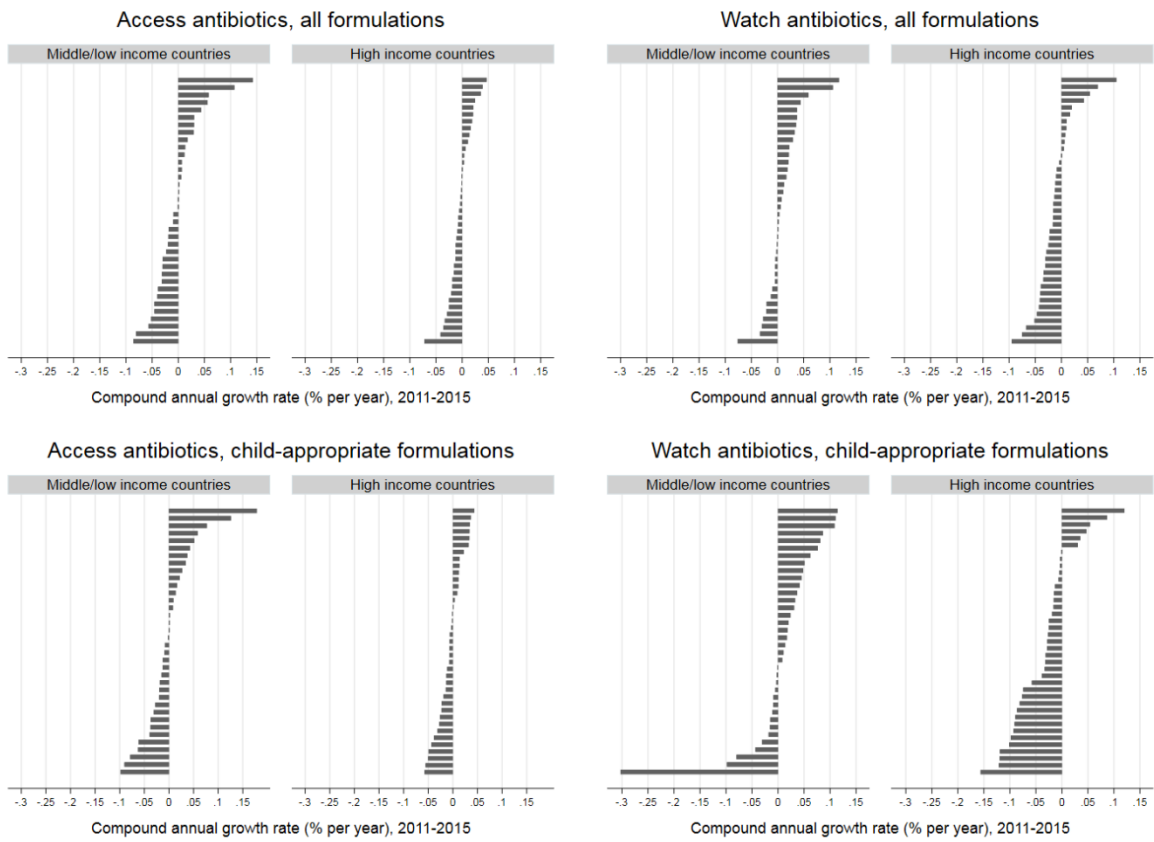

Appendix Figure 2: Compound annual growth rates in consumption per child of amoxicillin and amoxicillin with clavulanic acid for individual countries, 2011-2015. Source: IQVIA.

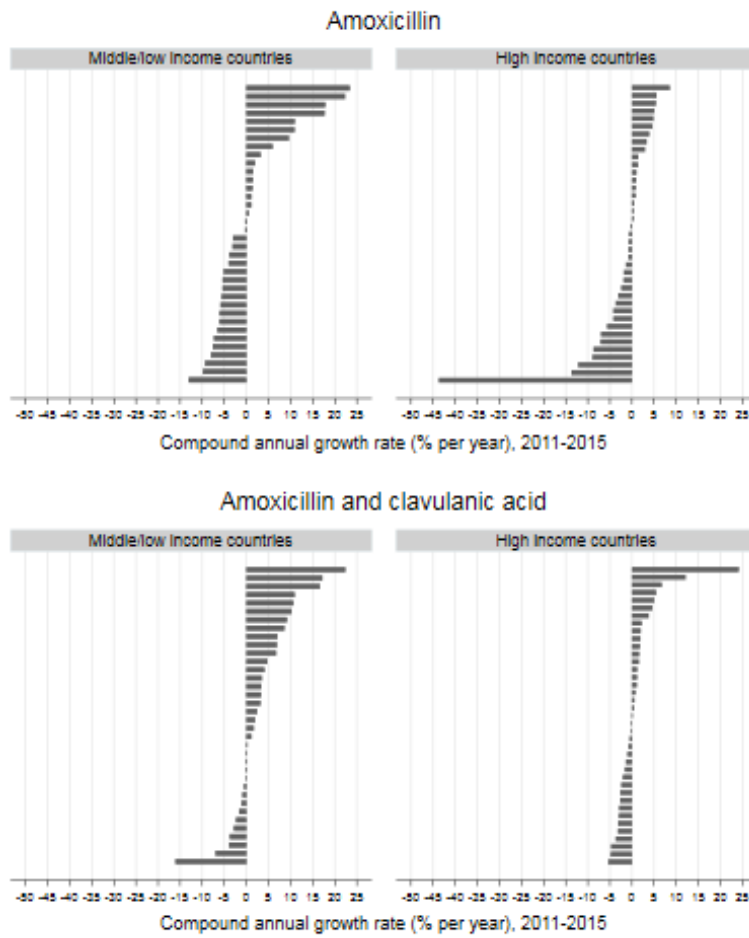

Supplement: bmjgh-2018-001241supp001.pdf [file bmjgh-2018-001241supp001.pdf]
